# Supplementary material for: Association between hemoglobin levels and ICU length of stay in Traumatic Brain Injury Patients: A retrospective cohort study from MIMIC database
Source: Research Square preprint supplement (doi:10.21203/rs.3.rs-7055252/v1), 2025-08-21
Supplement: Supplementary file 1 [file ab03fc2ffdc03690138b7e75.docx]

***Supplementary Material***

Table S1: Missing value of data from the MIMIC-IV database

| Variables | Miss.freq | Miss.percentage% |
| --- | --- | --- |
| Demographics | | |
| gender | 0 | 0 |
| age, year | 0 | 0 |
| Commodities | | |
| Heart disease | 0 | 0 |
| Cerebrovascular disease | 0 | 0 |
| Chronic pulmonary disease | 0 | 0 |
| Liver disease | 0 | 0 |
| Diabetes | 0 | 0 |
| Renal disease | 0 | 0 |
| Vital signs | | |
| HR,bpm | 3 | 0.1266 |
| MBP,mmHg | 3 | 0.1266 |
| Temperature,℃ | 7 | 0.2955 |
| spo2,% | 3 | 0.1266 |
| RR, bpm | 17 | 0.7176 |
| Lab test | | |
| haemoglobin, g/dL | 36 | 1.5196 |
| WBC,109/L | 36 | 1.5196 |
| Hematocrit,% | 36 | 1.5196 |
| Platelets,109/L | 36 | 1.5196 |
| Bicarbonate,mmol/L | 35 | 1.4774 |
| Anion gap,mmol/L | 35 | 1.4774 |
| Sodium,mmol/L | 35 | 1.4774 |
| Chloride,mmol/L | 35 | 1.4774 |
| Calcium,mg/dl | 73 | 3.0815 |
| Potassium,mmol/L | 35 | 1.4774 |
| Creatinine,mg/dl | 32 | 1.3508 |
| BUN,mg/dl | 34 | 1.4352 |
| glucose,mg/dl | 35 | 1.4774 |
| PT,s | 152 | 6.4162 |
| APTT, s | 159 | 6.7117 |
| INR | 152 | 6.4162 |
| Severity score | | |
| SAPAII | 0 | 0 |
| GCS | 3 | 0.1266 |
| CCI | 0 | 0 |
| Interventions | | |
| Transfusion | 0 | 0 |
| ventilation | 0 | 0 |
| Cardiovascular drug | 0 | 0 |
| Brain surgery | 0 | 0 |
| Outcomes | | |
| Length of ICU stay,days | 0 | 0 |

SD,Standard deviation;IQR,interquartile range;HR,Heart rate; MBP,Mean arterial pressure;GCS,Glasgow Coma Scale;PT,Prothrombin Time;APTT,Activated Partial Thromboplastin Time;RR,Respiratory Rate;SPO2,Peripheral Capillary Oxygen Saturation;INR,International Normalized Ratio;WBC,White Blood Cell Count;BUN, Blood Urea Nitrogen;SAPS ii,Simplified Acute Physiology Score II
